# Supplementary material for: Acridine derivative as a “turn on” probe for selective detection of picric acid via PET deterrence
Source: Royal Society of Chemistry journal article supplement (doi:10.1039/c6ra16537k), 2016-01-01
Supplement: c6ra16537k1.pdf [file c6ra16537k1.pdf]

## Electronic Supporting Information

### Acridine derivative as a “turn on” probe for selective detection of picric acid via PET deterrence

Santosh Chemate, Yogesh Erande, Dhanraj Mohbiya, Nagaiyan Sekar\*

Department of Dyestuff Technology, Institute of Chemical Technology, Mumbai- 400 019 (India)

Email: n.sekar@ictmumbai.edu.in, nethi.sekar@gmail.com Tel: + 91 22 3361 2707.

---

#### Table of contents:

##### 1. Supplementary spectral data

Fig. S1 and Fig. S2 -----2

Fig. S3 and Fig. S4 -----3

Fig. S5-----4

##### 2. The characterization data of compound 1a and 2a

<sup>1</sup>H NMR spectra of 1a -----5

<sup>13</sup>C NMR spectra of 1a -----6

<sup>1</sup>H NMR spectra of 2a -----7

<sup>13</sup>C NMR spectra of 2a -----8

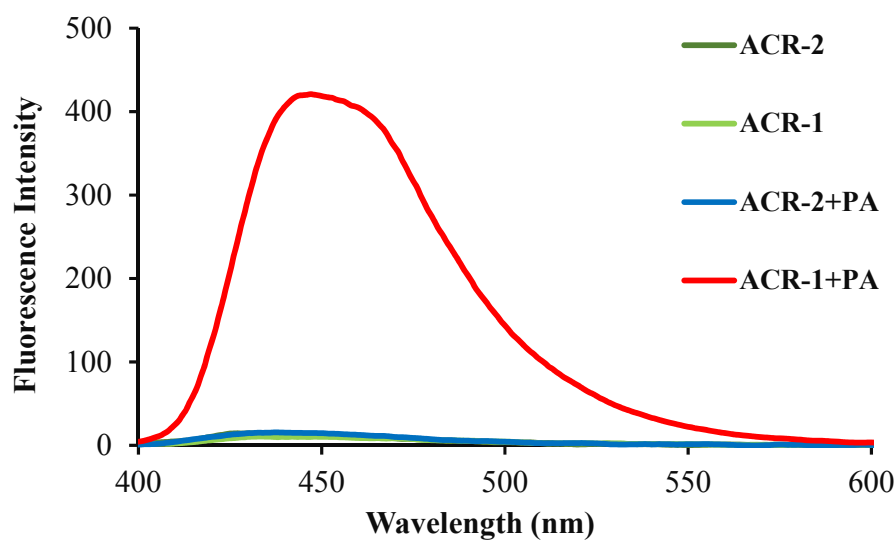

**SI Fig. 1** Changes in the fluorescence emission spectra of **ACR-1** and **ACR-2** (10  $\mu$ M) in presence and absence of Picric acid (10 eq.) in MeOH.  $\lambda_{ex}$  = 378 nm (Slit widths: 5 nm/5 nm).

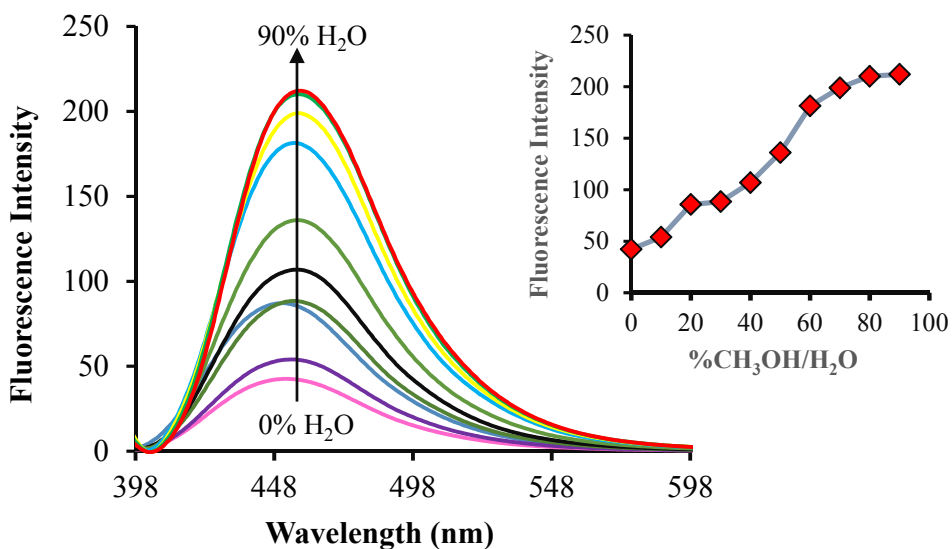

**SI Fig. 2** Changes in the fluorescence emission spectra of **ACR-1** (5  $\mu$ M) in  $\text{CH}_3\text{OH}/\text{H}_2\text{O}$  mixture presence Picric acid (10 eq.). Inset: The fluorescence intensity (F.I.) at 443 nm as a function of  $\text{CH}_3\text{OH}/\text{H}_2\text{O}$  mixture.  $\lambda_{ex}$  = 378 nm (Slit widths: 5 nm/5 nm).

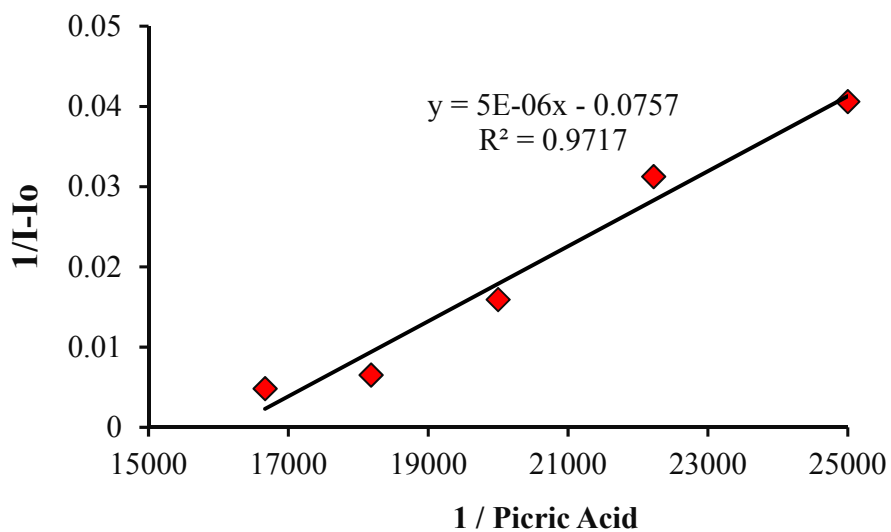

**SI Fig. 3** Benesi–Hildebrand plot for **ACR-1** and Picric acid to calculate the binding association constant ( $K_a=1.5 \times 10^4 \text{ M}^{-1}$ )

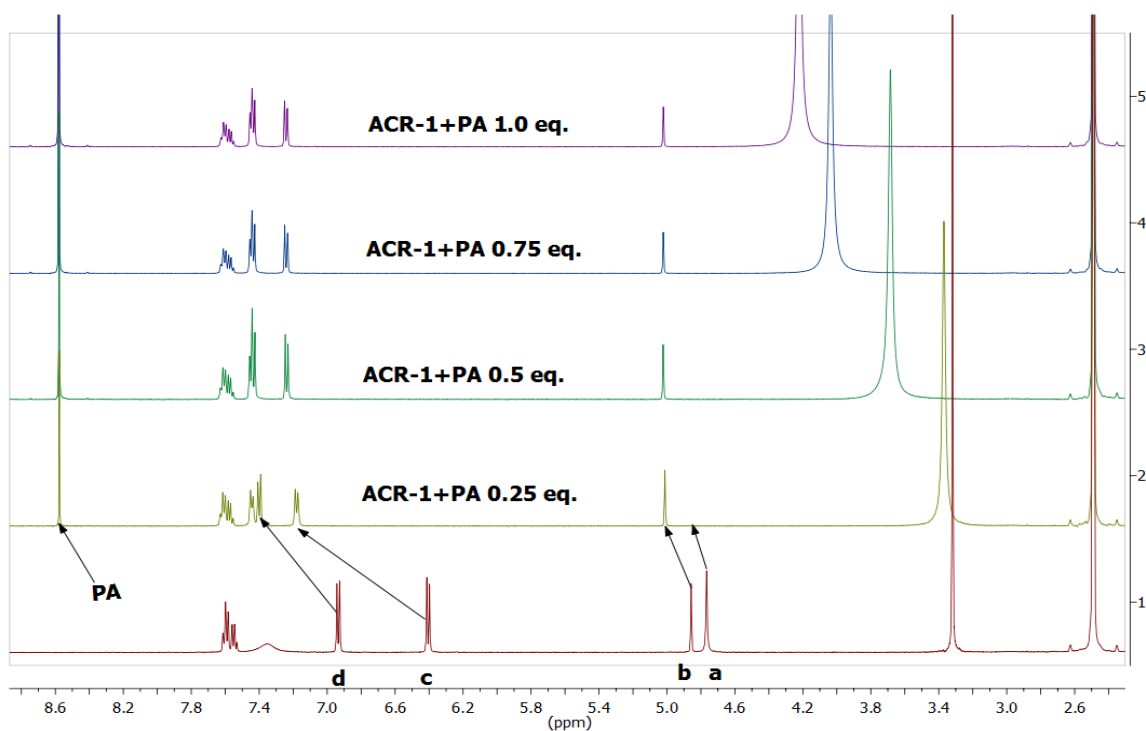

**SI Fig. 4**  $^1\text{H-NMR}$  stacked plots showing the change in the proton signal of **ACR-1** on binding with Picric acid in  $\text{DMSO-}d_6$ .

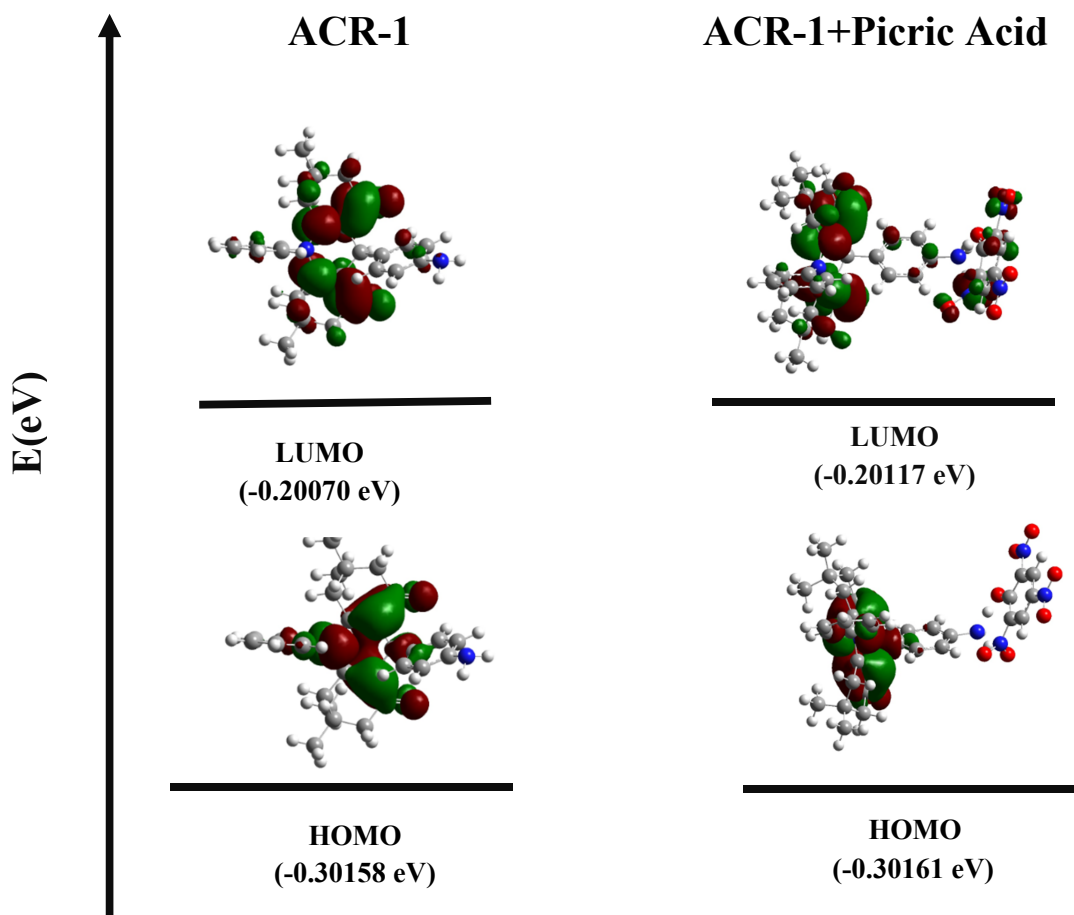

**SI Fig. 5** HOMO and LUMO orbital of receptor ACR-1 and ACR-1+PA calculated by B3LYP method with the 6-31G\* basis set.

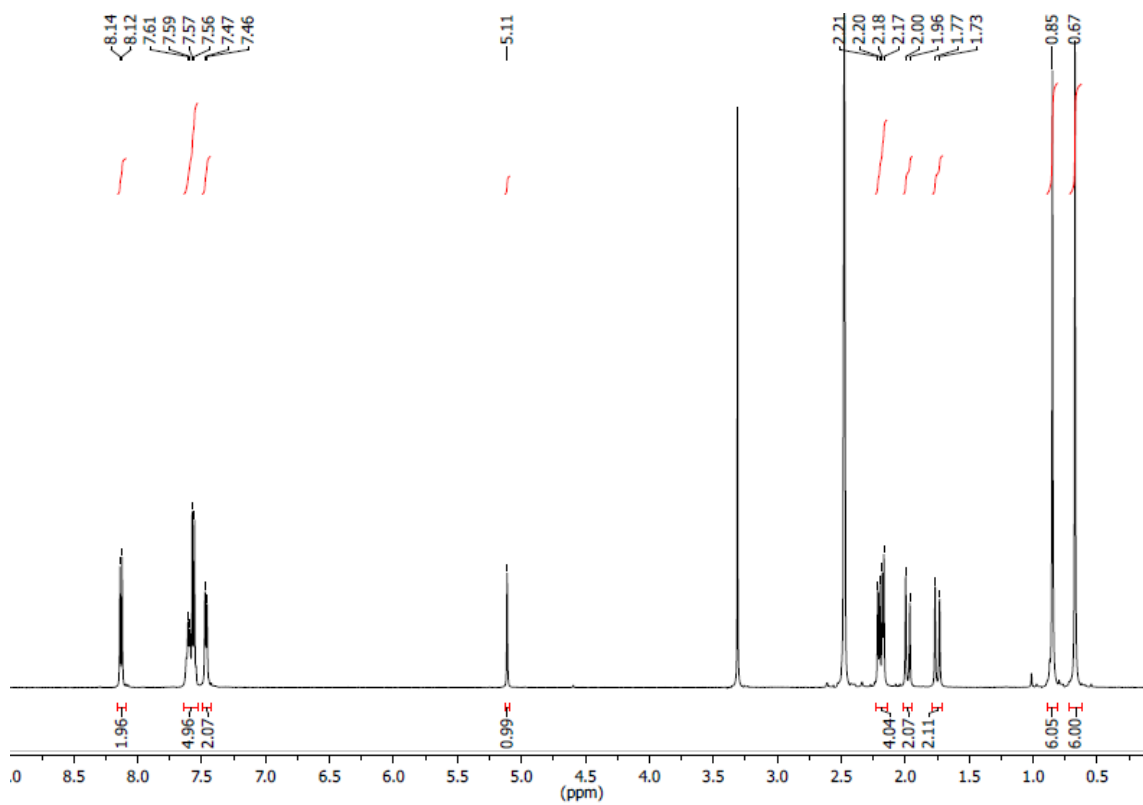

SI Fig. 5  $^1\text{H}$  NMR of 1a in  $\text{DMSO-}d_6$

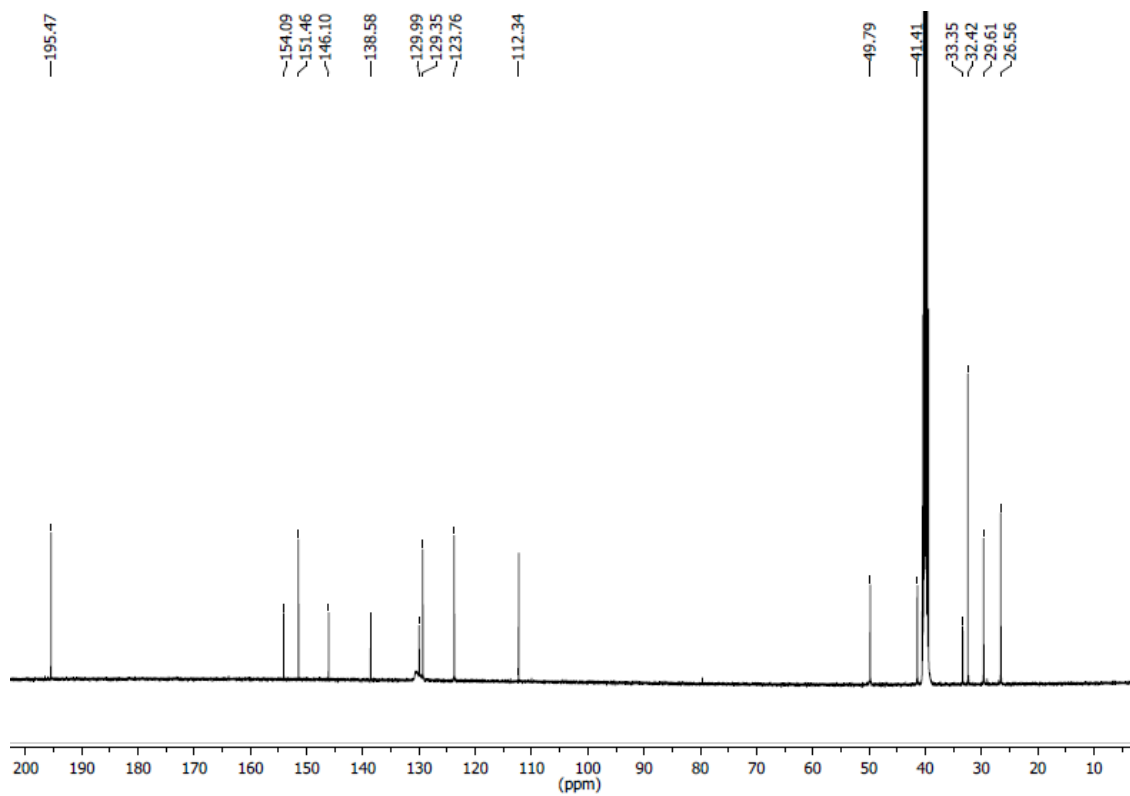

SI Fig. 6  $^{13}\text{C}$  NMR of 1a in  $\text{DMSO-}d_6$

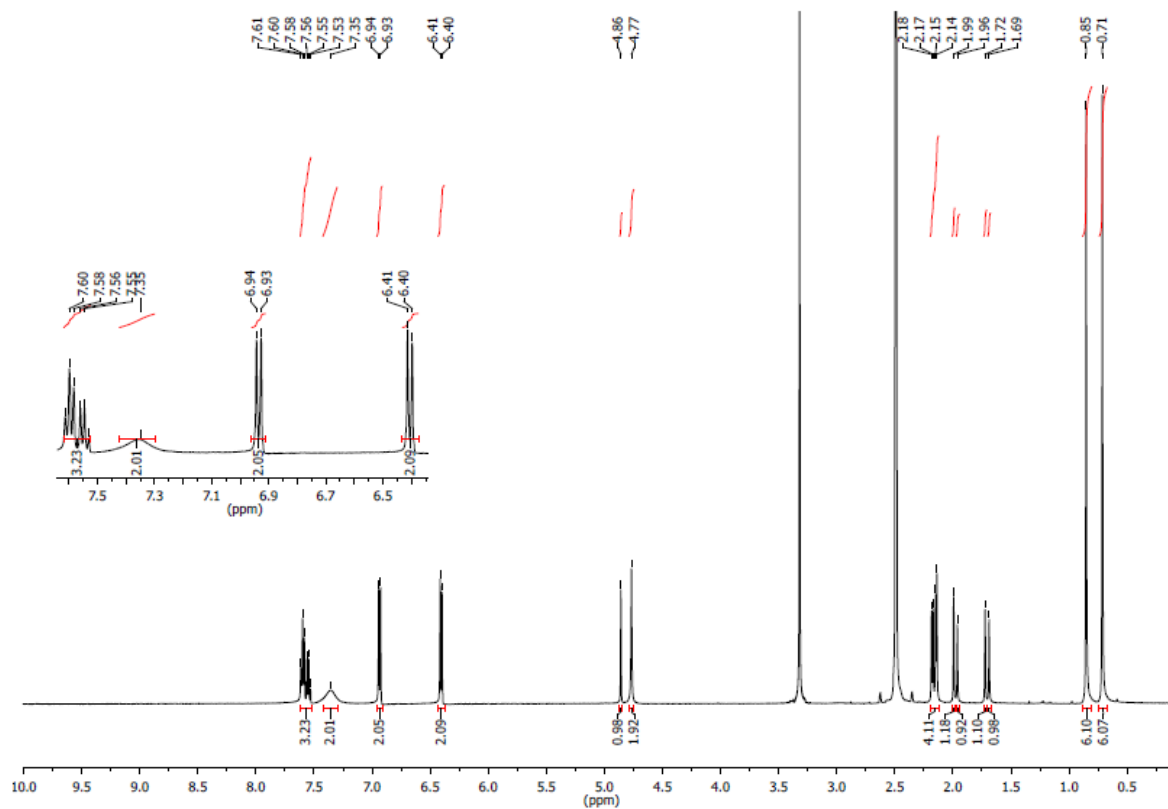

SI Fig. 7  $^1\text{H}$  NMR of 2a in  $\text{DMSO-}d_6$

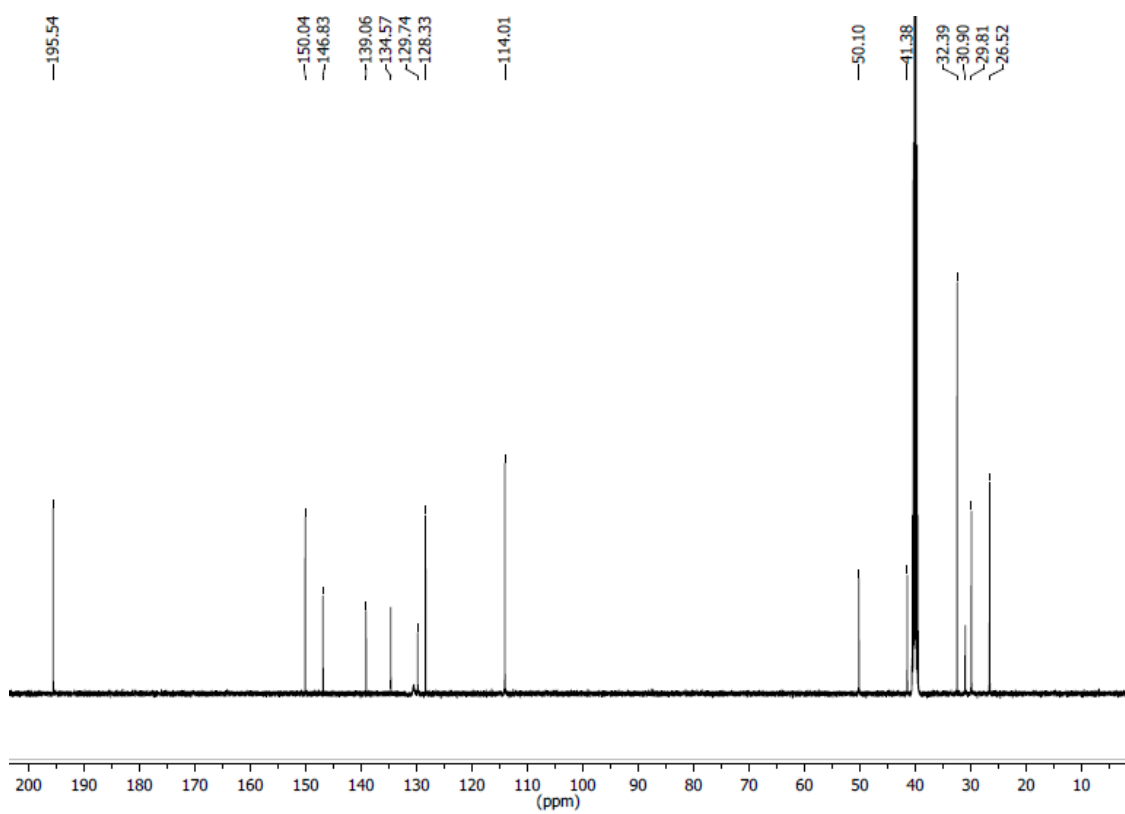

SI Fig. 8  $^{13}\text{C}$  NMR of 2a in DMSO- $d_6$
